# Supplementary material
Source: PubMed Central journal article supplement (PMC2785289)
Supplement: 0907248106_0907248106SI.pdf [file 0907248106_0907248106SI.pdf]

# Supporting Information

Cohen et al. 10.1073/pnas.0907248106

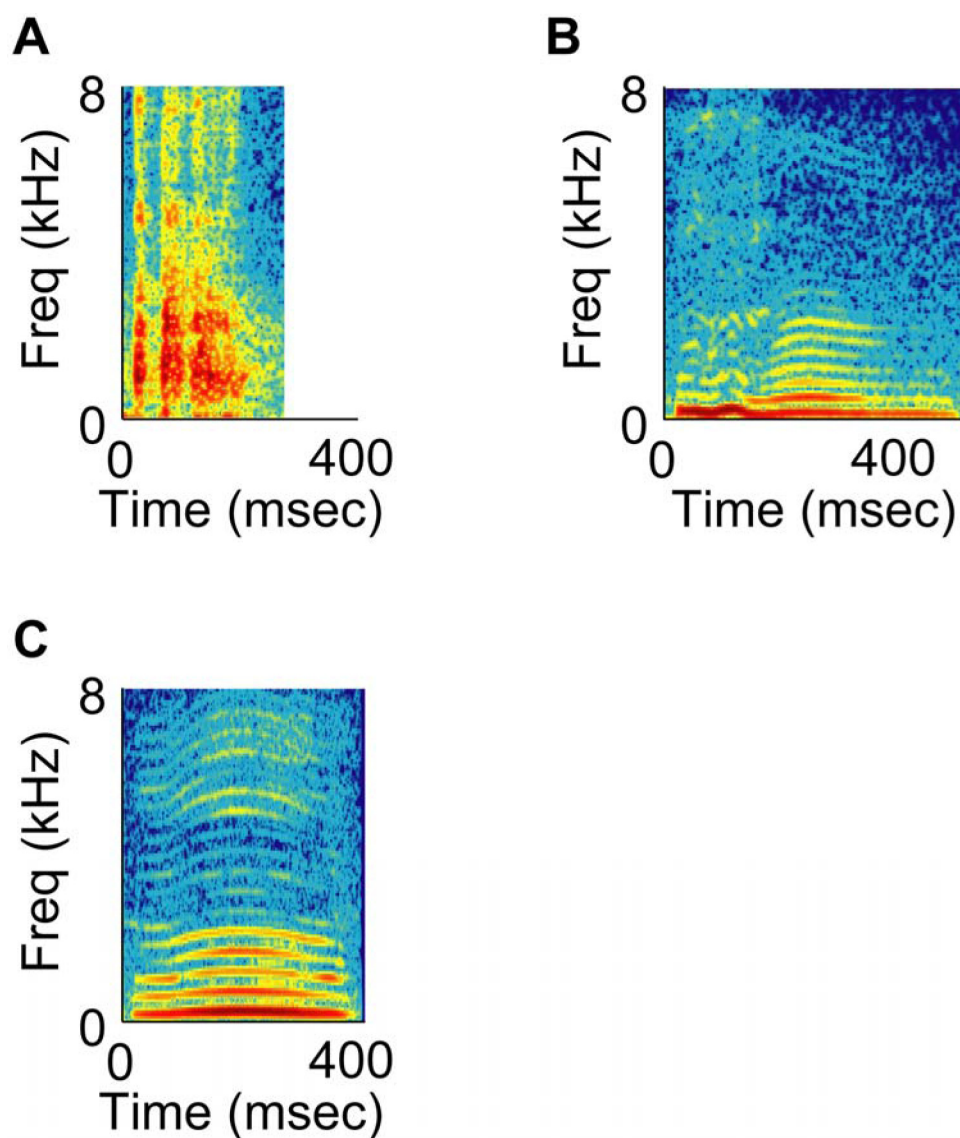

Fig. S1. Spectrographic representations of the (A) grunt, (B) coo, and (C) warble vocalizations used in this study.

### A. DETECT-TYPE TASK

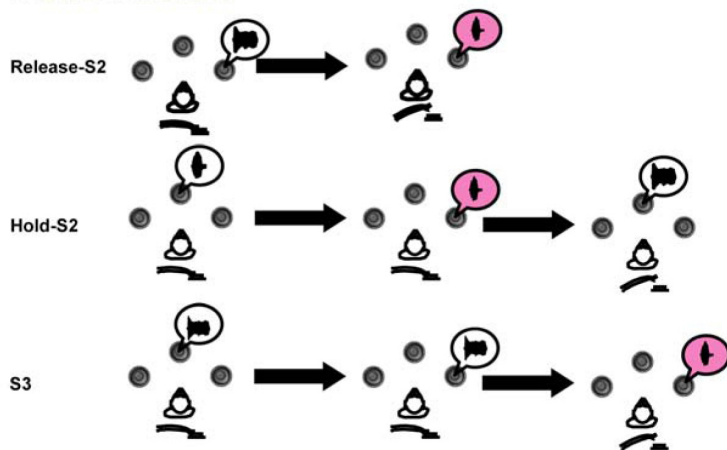

### B. DETECT-LOCATION TASK

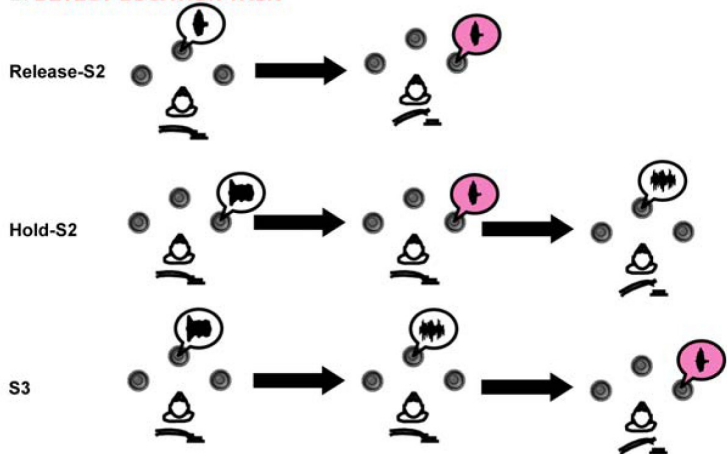

### C. Schematic of the timing of the two trials of the DETECT tasks

#### Detect-type Task

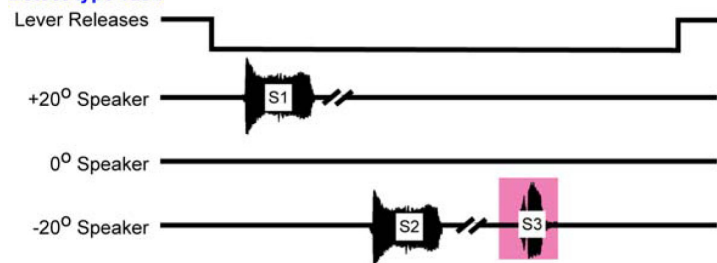

#### Detect-location Task

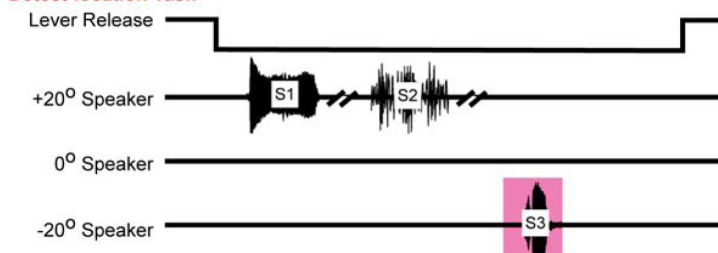

**Fig. S2.** Detect tasks. The time courses of the different trial types of the (A) detect-type task and the (B) detect-location task. The VLT is highlighted in pink. For both panels, the top row illustrates a trial in which the VLT is the release-S2 stimulus; the middle row illustrates a trial in which the VLT is the hold-S2 stimulus; and the bottom row illustrates a trial in which the VLT is the S3 stimulus. The icons illustrate the monkey's hand position on the lever during each stimulus presentation: the downward positioned hand indicates that the monkey is holding the lever, whereas the upward hand indicates a lever release. Not all variants of the different trial types that were presented are shown. In panel C, we illustrate the timing of two trials of the detect-location task and the detect-type tasks, respectively. In these schematics, time progresses from left to right. The VLT in both panels is highlighted in pink.
